# Supplementary material for: Biogeochemical and plant trait mechanisms drive enhanced methane emissions in response to whole-ecosystem warming
Source: Copernicus journal article supplement (doi:10.5194/bg-18-2449-2021), 2021-04-19
Supplement: Supplementary file 1 [file bg-18-2449-2021-supplement.pdf]

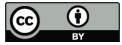

*Supplement of*

## **Biogeochemical and plant trait mechanisms drive enhanced methane emissions in response to whole-ecosystem warming**

**Genevieve L. Noyce and J. Patrick Megonigal**

*Correspondence to:* Genevieve L. Noyce (noyceg@si.edu)

The copyright of individual parts of the supplement might differ from the article licence.

Table S1. Calculated limit of detection ( $\text{LOD}_{\text{flux}}$ ) of chamber flux system.

| # of stacked<br>chambers | $\text{LOD}_{\text{flux}}$<br>( $\mu\text{mol CH}_4 \text{ m}^{-2} \text{ d}^{-1}$ ) |
|--------------------------|--------------------------------------------------------------------------------------|
| 1                        | 8.7                                                                                  |
| 2                        | 17.4                                                                                 |
| 3                        | 26.1                                                                                 |
| 4                        | 34.9                                                                                 |

Table S2. Estimated annual CH<sub>4</sub> flux for each plot in 2017, 2108, and 2019.

| Plot | Temperature Treatment | Plant Community | Replicate Transect | Estimated Annual CH <sub>4</sub> Flux (mmol CH <sub>4</sub> m <sup>-2</sup> yr <sup>-1</sup> ) |        |       | Mean (SE) Annual CH <sub>4</sub> Flux (mmol CH <sub>4</sub> m <sup>-2</sup> yr <sup>-1</sup> ) |                  |                  |
|------|-----------------------|-----------------|--------------------|------------------------------------------------------------------------------------------------|--------|-------|------------------------------------------------------------------------------------------------|------------------|------------------|
|      |                       |                 |                    | 2017                                                                                           | 2018   | 2019  | 2017                                                                                           | 2018             | 2019             |
| 310  | Ambient               | C <sub>3</sub>  | 1                  | 59.9                                                                                           | 125.5  | 83.7  | 58.4<br>(6.9)                                                                                  | 161.4<br>(37.0)  | 80.4<br>(11.4)   |
| 320  |                       |                 | 2                  | 69.6                                                                                           | 235.4  | 98.3  |                                                                                                |                  |                  |
| 330  |                       |                 | 3                  | 45.8                                                                                           | 123.2  | 59.1  |                                                                                                |                  |                  |
| 311  | +1.7 °C               | C <sub>3</sub>  | 1                  | 58.8                                                                                           | 186.6  | 82.8  | 69.2<br>(21.8)                                                                                 | 189.2<br>(23.0)  | 82.1<br>(6.5)    |
| 321  |                       |                 | 2                  | 111.0                                                                                          | 230.2  | 93.0  |                                                                                                |                  |                  |
| 331  |                       |                 | 3                  | 37.8                                                                                           | 150.9  | 70.6  |                                                                                                |                  |                  |
| 312  | +3.4 °C               | C <sub>3</sub>  | 1                  | 87.5                                                                                           | 160.5  | 113.6 | 82.6<br>(12.2)                                                                                 | 178.8<br>(21.5)  | 90.7<br>(13.4)   |
| 322  |                       |                 | 2                  | 100.9                                                                                          | 221.7  | 67.2  |                                                                                                |                  |                  |
| 332  |                       |                 | 3                  | 59.5                                                                                           | 154.1  | 91.2  |                                                                                                |                  |                  |
| 313  | +5.1 °C               | C <sub>3</sub>  | 1                  | 334.4                                                                                          | 621.9  | 665.1 | 178.0<br>(78.2)                                                                                | 343.2<br>(140.0) | 317.6<br>(174.5) |
| 323  |                       |                 | 2                  | 101.4                                                                                          | 180.1  | 115.6 |                                                                                                |                  |                  |
| 333  |                       |                 | 3                  | 98.3                                                                                           | 227.6  | 172.1 |                                                                                                |                  |                  |
| 440  | Ambient               | C <sub>4</sub>  | 4                  | 63.1                                                                                           | 424.5  | 121.2 | 55.0<br>(6.9)                                                                                  | 425.5<br>(88.6)  | 205.1<br>(45.2)  |
| 450  |                       |                 | 5                  | 60.8                                                                                           | 579.4  | 217.8 |                                                                                                |                  |                  |
| 460  |                       |                 | 6                  | 41.2                                                                                           | 272.4  | 276.3 |                                                                                                |                  |                  |
| 441  | +1.7 °C               | C <sub>4</sub>  | 4                  | 37.6                                                                                           | 298.4  | 154.9 | 61.7<br>(12.3)                                                                                 | 370.9<br>(73.7)  | 417.6<br>(156.1) |
| 451  |                       |                 | 5                  | 69.7                                                                                           | 518.3  | 695.0 |                                                                                                |                  |                  |
| 461  |                       |                 | 6                  | 77.9                                                                                           | 295.9  | 403.0 |                                                                                                |                  |                  |
| 442  | +3.4 °C               | C <sub>4</sub>  | 4                  | 40.1                                                                                           | 301.0  | 173.5 | 84.8<br>(24.5)                                                                                 | 471.0<br>(96.9)  | 386.8<br>(127.6) |
| 452  |                       |                 | 5                  | 89.8                                                                                           | 636.5  | 614.8 |                                                                                                |                  |                  |
| 462  |                       |                 | 6                  | 124.5                                                                                          | 475.3  | 371.9 |                                                                                                |                  |                  |
| 443  | +5.1 °C               | C <sub>4</sub>  | 4                  | 84.3                                                                                           | 288.8  | 127.7 | 157.8<br>(37.1)                                                                                | 879.3<br>(328.9) | 469.9<br>(175.2) |
| 453  |                       |                 | 5                  | 185.2                                                                                          | 1425.7 | 706.6 |                                                                                                |                  |                  |
| 463  |                       |                 | 6                  | 203.8                                                                                          | 923.3  | 575.5 |                                                                                                |                  |                  |

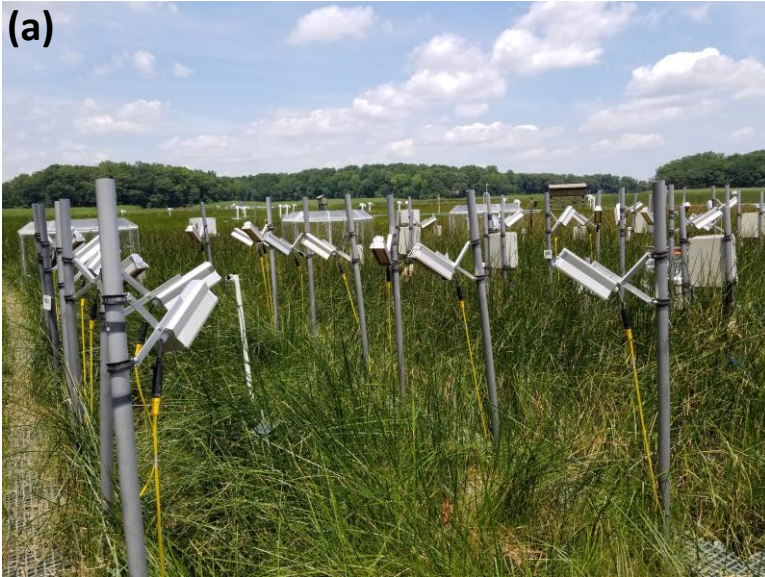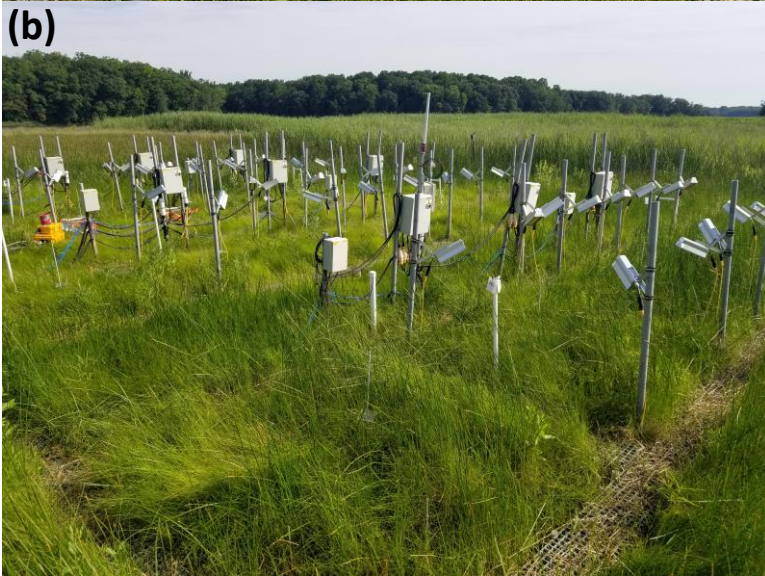

Figure S1. SMARTX plots in (a) the  $C_3$  community (dominated by *Schoenoplectus americanus*) and (b) the  $C_4$  community (dominated by *Spartina patens* and *Distichlis spicata*). Photos taken by G. Noyce.

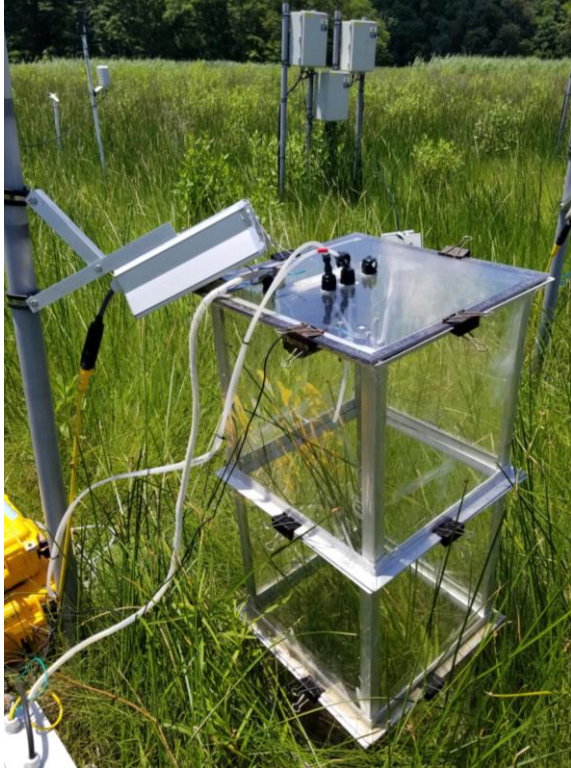

Figure S2. Stacked modular flux chambers. Photo taken by G. Noyce.

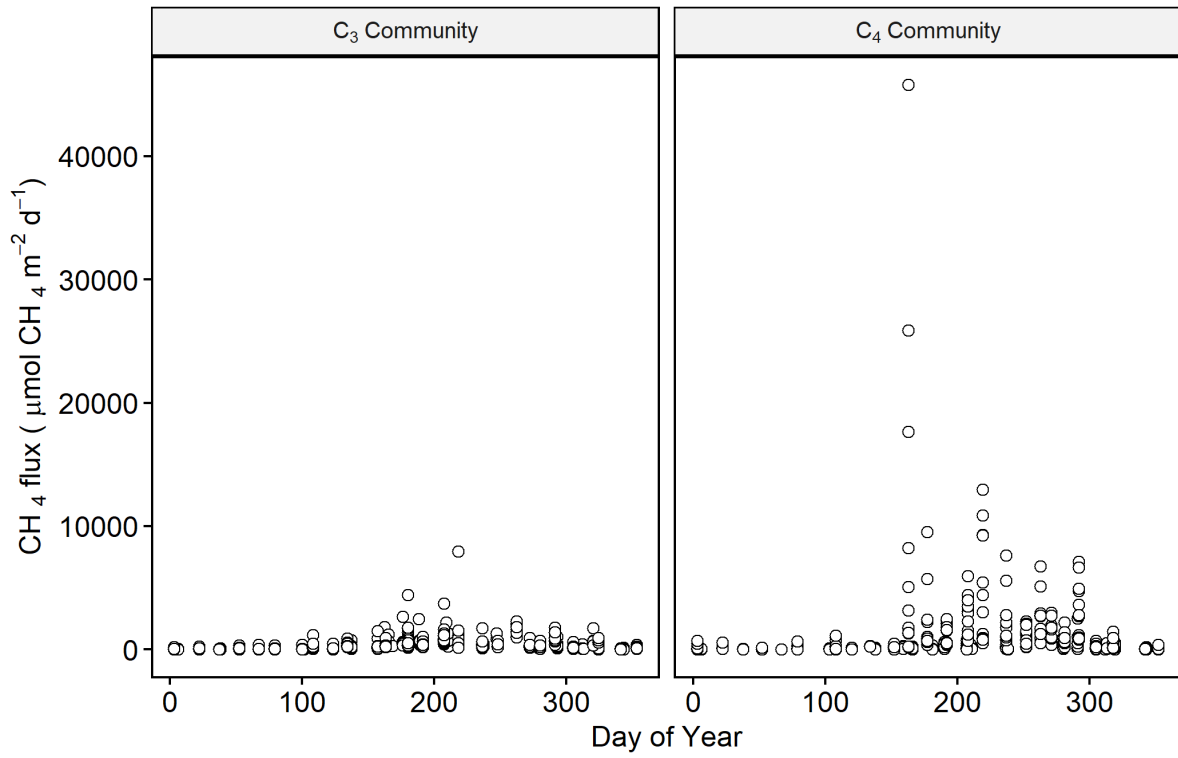

Figure S3. All raw CH<sub>4</sub> flux data.

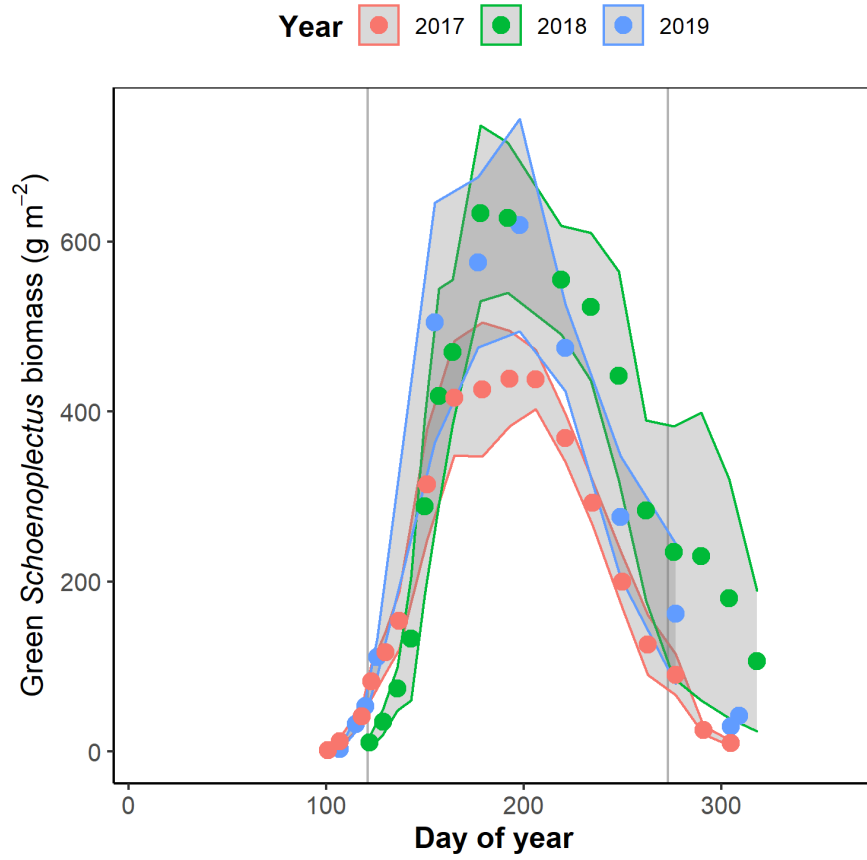

Figure S4. *Schoenoplectus* phenological data for 2017 – 2019 in ambient temperature plots. Points indicate means ( $n = 3$ ) and shaded area indicates SE. The vertical lines indicate the ‘growing season’, e.g. May 1 through Sep 30.

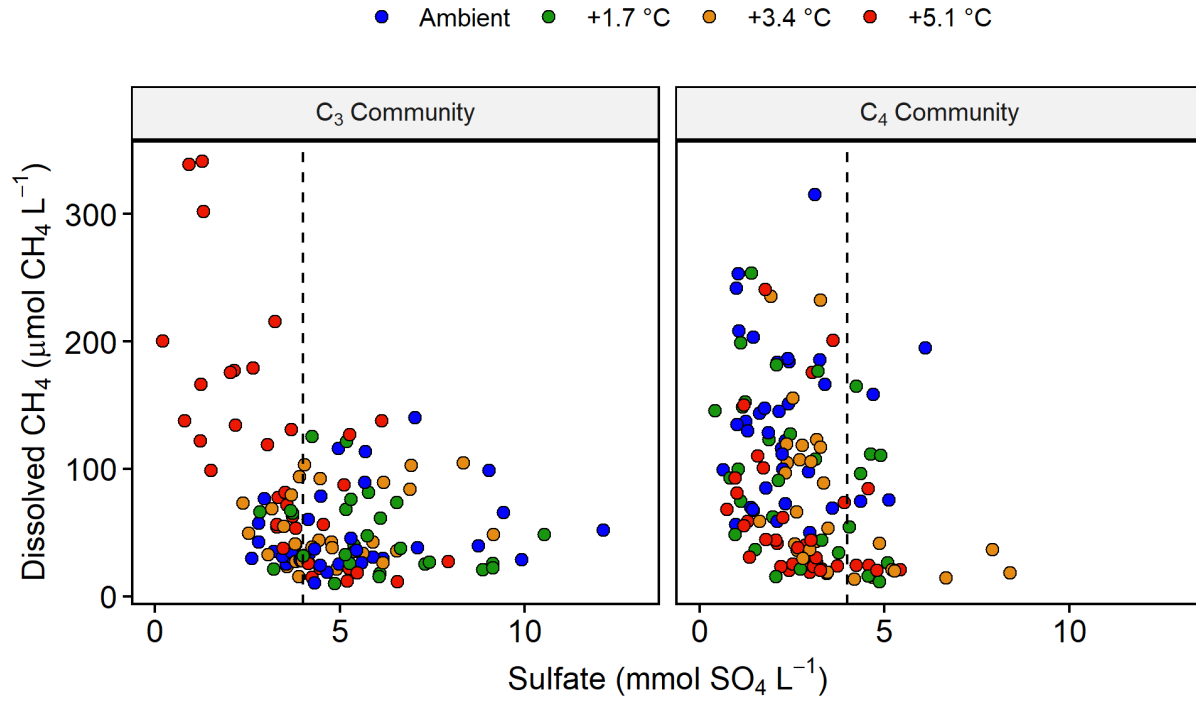

Figure S5. Mean concentrations of CH<sub>4</sub> and SO<sub>4</sub> for each plot and month that porewater was sampled. Colors indicate temperature treatment. The vertical dashed line indicates the 4 mm [SO<sub>4</sub>] threshold below which acetoclastic and hydrogenotrophic methanogenesis are released from substrate competition.

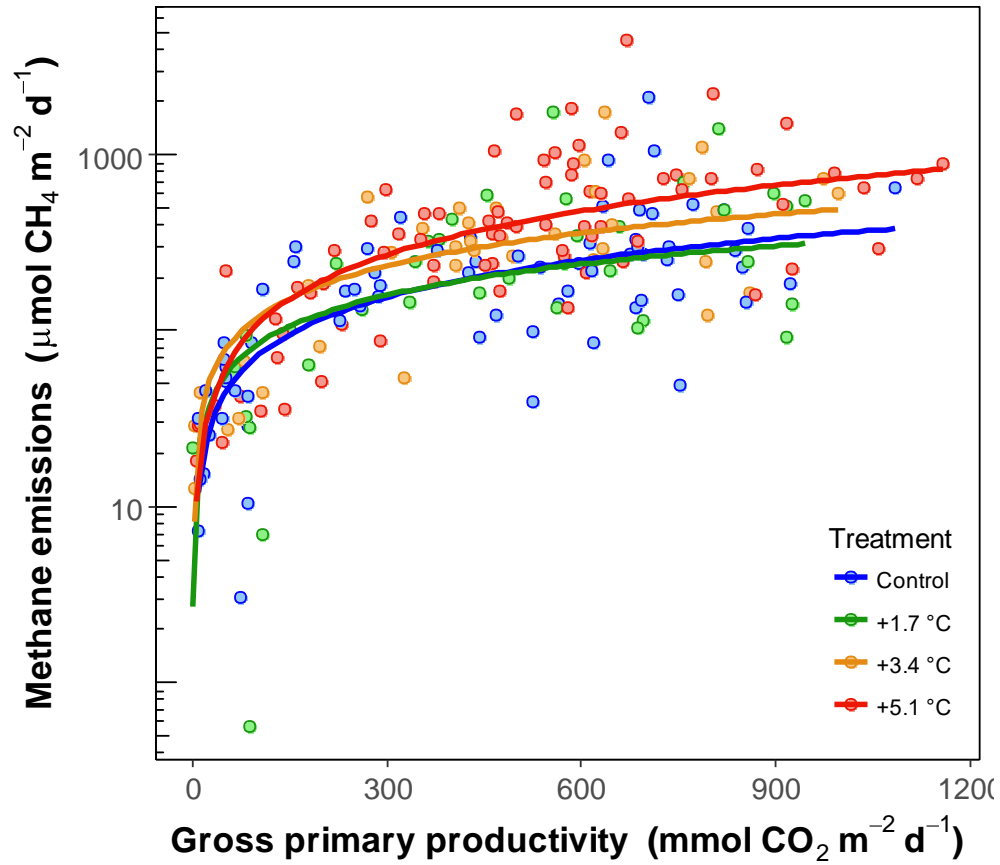

Figure S6. Methane emissions compared to gross primary productivity measured at the same time.  $\text{CH}_4$  emissions were strongly correlated with GPP.



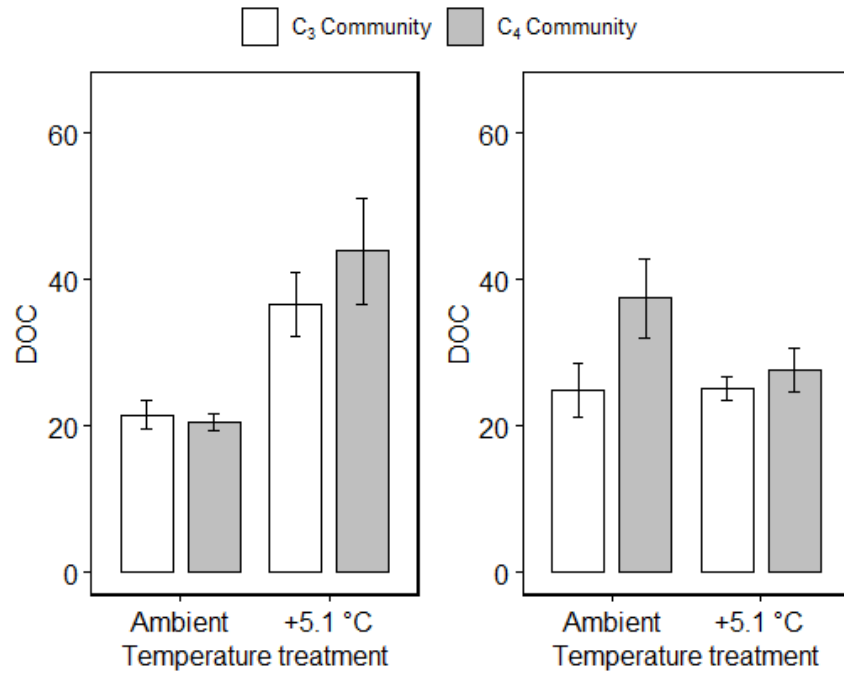

Figure S7. Comparison of DOC in July 2019 from the C<sub>3</sub> community dominated by *Schoenoplectus* (open bars) and the C<sub>4</sub> community dominated by *Spartina* and *Distichlis* (grey bars). Left: In the dominant rooting zone (10-20 cm); Right: below the rooting zone (40-120 cm). Error bars indicate SE.
